# Supplementary material
Source: publisher site journal article supplement (http://kjim.org/upload/media/kjim-2019-039-suppl6.pdf)
Supplement: Supplementary file 1 [file kjim-2019-039-suppl6.pdf]

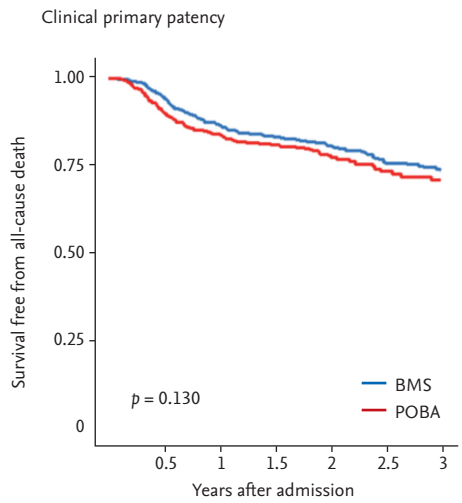

|      |     |     |     |     |
|------|-----|-----|-----|-----|
| BMS  | 937 | 591 | 369 | 178 |
| POBA | 620 | 367 | 230 | 81  |

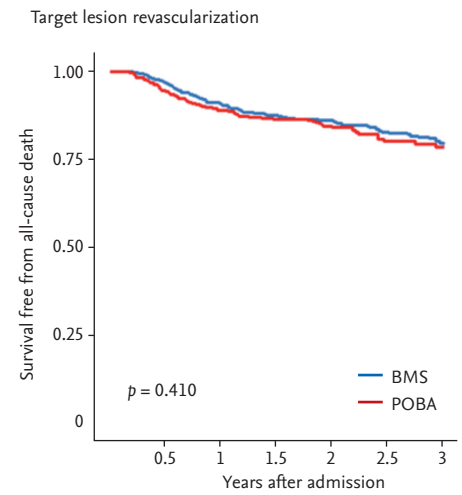

|      |     |     |     |     |
|------|-----|-----|-----|-----|
| BMS  | 937 | 613 | 391 | 194 |
| POBA | 620 | 388 | 249 | 97  |

**A**

**B**

**Supplementary Figure 1.** (A) Clinical primary patency. (B) Target lesion revascularization. BMS, bare metal stent; POBA, plain old balloon angioplasty.
